# Supplementary material for: Synthesis and characterization of [(CH3)2NH2][Na0.5Cr0.5(HCOO)3]: a rare example of luminescent metal–organic frameworks based on Cr(iii) ions
Source: Royal Society of Chemistry journal article supplement (doi:10.1039/c5dt00060b), 2015-01-01
Supplement: c5dt00060b1.pdf [file c5dt00060b1.pdf]

**“Synthesis and Characterization of [(CH<sub>3</sub>)<sub>2</sub>NH<sub>2</sub>][Na<sub>0.5</sub>Cr<sub>0.5</sub>(HCOO)<sub>3</sub>]: Rare Example of Luminescent Metal-Organic Framework Based on Cr(III) Ions”,**

by Mirosław Mączka et al.

Table S1. Data collection, cell, and refinement parameters for the single crystal X-ray diffraction studies carried out at 302 and 115 K.

| formula                                 | C <sub>5</sub> H <sub>11</sub> Cr <sub>0.5</sub> N <sub>2</sub> Na <sub>0.5</sub> | C <sub>5</sub> H <sub>11</sub> Cr <sub>0.5</sub> N <sub>2</sub> Na <sub>0.5</sub> O <sub>12</sub> |
|-----------------------------------------|-----------------------------------------------------------------------------------|---------------------------------------------------------------------------------------------------|
| Fw                                      | 218.64                                                                            | 218.64                                                                                            |
| T, K                                    | 302(2) K                                                                          | 115(2) K                                                                                          |
| wavelength                              | 0.71073 Å                                                                         | 0.71073 Å                                                                                         |
| crystal system                          | trigonal                                                                          | trigonal                                                                                          |
| space group                             | R-3                                                                               | R-3                                                                                               |
| a, Å                                    | 8.3280(12)                                                                        | 8.3121(12)                                                                                        |
| b, Å                                    | 8.3280(12)                                                                        | 8.3121(12)                                                                                        |
| c, Å                                    | 23.012(5)                                                                         | 22.778(5)                                                                                         |
| α, °                                    | 90                                                                                | 90                                                                                                |
| β, °                                    | 90                                                                                | 90                                                                                                |
| γ, °                                    | 120                                                                               | 120                                                                                               |
| V, Å <sup>3</sup>                       | 1382.2(4)                                                                         | 1362.9(4)                                                                                         |
| Z                                       | 6                                                                                 | 6                                                                                                 |
| F(000)                                  | 681                                                                               | 681                                                                                               |
| D <sub>c</sub> , g/cm <sup>3</sup>      | 1.576                                                                             | 1.598                                                                                             |
| Θ <sub>min</sub> , Θ <sub>max</sub> , ° | 2.96, 29.43                                                                       | 2.97, 29.58                                                                                       |
| index ranges                            | -11 ≤ h ≤ 11                                                                      | -11 ≤ h ≤ 10                                                                                      |
|                                         | -11 ≤ k ≤ 10,                                                                     | -10 ≤ k ≤ 11                                                                                      |
|                                         | -31 ≤ l ≤ 28                                                                      | -26 ≤ l ≤ 30                                                                                      |
| reflections collected                   | 5573                                                                              | 4546                                                                                              |
| unique reflns., R <sub>int</sub>        | 834, 0.0292                                                                       | 830, 0.0841                                                                                       |

|                                                  |                                   |                                   |
|--------------------------------------------------|-----------------------------------|-----------------------------------|
| Completeness to $\Theta$<br>= 29.43              | 97.1 %                            | 96.6 %                            |
| Data / restraints /<br>parameters                | 834 / 0 / 47                      | 830 / 0 / 47                      |
| Goodness of fit on<br>$F^2$                      | 1.091                             | 1.098                             |
| Final R indices<br>[ $I > 2\sigma(I)$ ]          | $R_1 = 0.0372$<br>$wR_2 = 0.0974$ | $R_1 = 0.0686$<br>$wR_2 = 0.1131$ |
| R indices (all data)                             | $R_1 = 0.0503$<br>$wR_2 = 0.1005$ | $R_1 = 0.1203$<br>$wR_2 = 0.1299$ |
| largest diff. peak<br>and hole, e $\text{\AA}^3$ | 0.455 and -0.538                  | 0.620 and -0.547                  |

---

Table S2. IR and Raman frequencies (in  $\text{cm}^{-1}$ ) of DMNaCr and suggested assignments.<sup>a</sup>

| Raman<br>294 K | Raman<br>80 K | IR<br>295 K    | IR<br>5 K      | assignment                                                                                       |
|----------------|---------------|----------------|----------------|--------------------------------------------------------------------------------------------------|
|                |               | 3126s          | 3134m          | $\nu(\text{NH}_2)$                                                                               |
|                |               | 3065sh         | 3071m          | $\nu(\text{NH}_2)$                                                                               |
| 3048sh         | 3046m         |                | 3038w          | $\nu_{\text{as}}(\text{CH}_3)$                                                                   |
| 3038m          | 3035m         | 3034w          | 3028w          | $\nu_{\text{as}}(\text{CH}_3)$                                                                   |
|                |               | 3007sh         | 3012m,b        | $\nu(\text{NH}_2)$                                                                               |
| 2971s          | 2971s         | 2975w          | 2974w          | $\nu_{\text{s}}(\text{CH}_3)$                                                                    |
| 2035vw         | 2939w         | 2936vw         | 2945m          | $\nu_{\text{s}}(\text{CH}_3)$                                                                    |
| 2905vw         | 2906vw        |                |                | $\nu_4(\text{HCOO}^-) + \nu_5(\text{HCOO}^-)$                                                    |
| 2873m          | 2880sh, 2870m | 2873s          | 2882sh, 2866s  | $\nu_1(\text{HCOO}^-)$                                                                           |
| 2858m          | 2855w         | 2860s          | 2856s          |                                                                                                  |
| 2822w          | 2816w         |                |                | $\nu(\text{NH}_2)$                                                                               |
|                |               | 2791s          | 2828m, 2812w   | $\nu(\text{NH}_2)$                                                                               |
|                |               |                | 2777s          |                                                                                                  |
| 2737w          | 2741w         | 2741vw         | 2742w          | $2\nu_5(\text{HCOO}^-)$                                                                          |
|                |               | 2567w, 2499w   | 2583vw, 2537w  | $\rho(\text{NH}_2) + \delta(\text{NH}_2)$                                                        |
|                |               |                | 2524w, 2512w   |                                                                                                  |
|                |               | 2457w          | 2471w, 2460w   | combinations of $\rho(\text{CH}_3)$ ,<br>$\delta(\text{CH}_3)$ and $\nu_{\text{as}}(\text{CNC})$ |
|                |               |                | 2454w          |                                                                                                  |
| 1676m          | 1674m         | 1673sh         | 1676w          | $\nu(\text{CO})$                                                                                 |
| 1621w          | 1622w         | 1651sh, 1634vs | 1652sh, 1635vs | $\nu_4(\text{HCOO}^-)$ and $\delta(\text{NH}_2)$                                                 |
| 1585w          | 1597w         | 1596s          | 1609w, 1594s   | $\nu_4(\text{HCOO}^-)$                                                                           |
|                |               |                | 1573m, 1559w   |                                                                                                  |
|                |               |                | 1488w          | $\omega(\text{NH}_2)$                                                                            |
| 1473sh         | 1483w, 1470w  | 1471w          | 1474w          | $\delta_{\text{as}}(\text{CH}_3)$                                                                |
| 1458w          | 1456m         | 1459w          | 1458w          | $\delta_{\text{as}}(\text{CH}_3)$                                                                |
|                |               | 1441w          | 1441w          | $\delta_{\text{as}}(\text{CH}_3)$                                                                |
| 1435vw         | 1432w         |                | 1433w, 1429w   | $\tau(\text{NH}_2)$                                                                              |
| 1416vw         | 1416vw        | 1420vw         | 1415vw         | $\delta_{\text{s}}(\text{CH}_3)$                                                                 |

|        |              |        |                        |                                            |
|--------|--------------|--------|------------------------|--------------------------------------------|
| 1376s  | 1381m, 1373s | 1379m  | 1384w, 1376m           | $\nu_5(\text{HCOO}^-)$                     |
| 1337m  | 1336m        |        | 1339w                  | $\nu_5(\text{HCOO}^-)$                     |
| 1318m  | 1308m        | 1320s  | 1315s                  | $\nu_2(\text{HCOO}^-)$                     |
| 1292m  | 1290m, 1279m | 1291s  | 1292s, 1287m<br>1272sh | $\nu_2(\text{HCOO}^-)$                     |
| 1233vw | 1233w        | 1257sh | 1259sh                 | $\rho(\text{CH}_3)$                        |
| 1121vw |              |        |                        | $\rho(\text{CH}_3)$                        |
| 1092w  | 1095w        | 1095vw | 1098vw                 | $\rho(\text{CH}_3)$                        |
| 1057w  | 1062w        | 1061vw | 1067vw, 1061vw         | $\nu_6(\text{HCOO}^-)$                     |
|        |              | 1046vw | 1048vw                 | $\rho(\text{CH}_3)$                        |
| 1023w  | 1024w        | 1024m  | 1026m                  | $\nu_{\text{as}}(\text{CNC})$              |
|        |              | 886w,b | 907w,b                 | $\rho(\text{NH}_2)$                        |
| 890m   | 892m         | 893w   | 895w                   | $\nu_5(\text{CNC})$                        |
|        |              | 813s   | 818s, 813s             | $\nu_3(\text{HCOO}^-)$                     |
| 800m   | 802m         |        | 800w                   | $\nu_3(\text{HCOO}^-)$                     |
|        |              | 420m   | 427m, 420m             | $T'(\text{Na}^+)$ and $T'(\text{Cr}^{3+})$ |
| 403w   | 399m         | 403w   | 400w                   | $\delta(\text{CNC})$                       |
| 342m   | 347m         |        |                        | $T'(\text{Na}^+)$ and $T'(\text{Cr}^{3+})$ |
|        | 290vw        |        | 296m                   | $\tau(\text{CH}_3)$                        |
|        |              | 276m   | 282m                   | $T'(\text{Na}^+)$ and $T'(\text{HCOO}^-)$  |
| 225w   | 231w, 215w   | 247w   | 253w, 240w             | $T'(\text{Na}^+)$ and $T'(\text{HCOO}^-)$  |
|        |              | 190s   | 221w, 204s             | $T'(\text{HCOO}^-)$                        |
|        |              |        | 198s                   |                                            |
| 178m   | 184m         |        | 175w                   | $L(\text{HCOO}^-)$                         |
|        | 152w         |        |                        | $L(\text{DMA})$                            |
| 110s   | 108s         |        |                        | $L(\text{HCOO}^-)$                         |
|        |              | 100w   | 96w                    | $T'(\text{DMA})$                           |
| 60m    | 65m          |        |                        | $L(\text{HCOO}^-)$                         |

<sup>a</sup>Key: s, strong; m, medium; w, weak; vw, very weak; sh, shoulder; b, broad

Table S3. Energies of emission bands of DMNaCr at 10 K with their tentative assignments to R1, R2, Cr-Cr pair and vibronic bands.

| Energy  | Rel. intensity | Label                                           |
|---------|----------------|-------------------------------------------------|
| 14587.7 | 3.5            | L(HCOO <sup>-</sup> )                           |
| 14544.0 | 76.7           | R2                                              |
| 14526.0 | 51.0           | L(HCOO <sup>-</sup> )                           |
| 14511.5 | 52.9           | L(HCOO <sup>-</sup> )                           |
| 14477.0 | 52.7           | L(HCOO <sup>-</sup> )                           |
| 14495.3 | 100.0          | R1                                              |
| 14434.0 | 19.7           | L(HCOO <sup>-</sup> )                           |
| 14363.5 | 29.0           | L(HCOO <sup>-</sup> )                           |
| 14331.1 | 39.8           | T'(HCOO <sup>-</sup> )                          |
| 14256.2 | 33.9           | T'(Na <sup>+</sup> ) and T'(HCOO <sup>-</sup> ) |
| 14200.0 | 8.8            | T'(Na <sup>+</sup> ) and T'(Cr <sup>3+</sup> )  |
| 14166.8 | 8.6            | T'(Na <sup>+</sup> ) and T'(Cr <sup>3+</sup> )  |
| 14118.4 | 23.0           | pair                                            |
| 13947.2 | 6.8            | L(HCOO <sup>-</sup> )                           |
| 13796.3 | 5.0            | T'(Na <sup>+</sup> ) and T'(HCOO <sup>-</sup> ) |
| 13772.0 | 4.4            | v <sub>3</sub> (HCOO <sup>-</sup> )             |
| 13724.3 | 10.9           | pair                                            |
| 13662.0 | 4.3            | v <sub>3</sub> (HCOO <sup>-</sup> )             |
| 13555.0 | 3.8            | L(HCOO <sup>-</sup> )                           |
| 13535.0 | 3.9            | v <sub>as</sub> (CNC)                           |
| 13478.1 | 5.0            | v <sub>as</sub> (CNC)                           |
| 13409.0 | 3.2            | v <sub>6</sub> (HCOO <sup>-</sup> )             |
| 13312.0 | 3.8            | ρ(CH <sub>3</sub> )                             |
| 13252.0 | 7.5            | v <sub>2</sub> (HCOO <sup>-</sup> )             |
| 13233.8 | 8.8            | pair                                            |
| 13217.0 | 7.5            | v <sub>2</sub> (HCOO <sup>-</sup> )             |
| 13167.4 | 5.0            | v <sub>2</sub> (HCOO <sup>-</sup> )             |
| 13155.0 | 4.5            | v <sub>5</sub> (HCOO <sup>-</sup> )             |
| 13070.0 | 3.0            | δ <sub>s</sub> (CH <sub>3</sub> )               |
| 12990.0 | 2.7            | v <sub>4</sub> (HCOO <sup>-</sup> )             |
| 12939.8 | 3.0            | v <sub>4</sub> (HCOO <sup>-</sup> )             |

|         |     |                        |
|---------|-----|------------------------|
| 12910.4 | 3.2 | $\nu_4(\text{HCOO}^-)$ |
| 12804.0 | 2.5 | $\nu(\text{CO})$       |

---

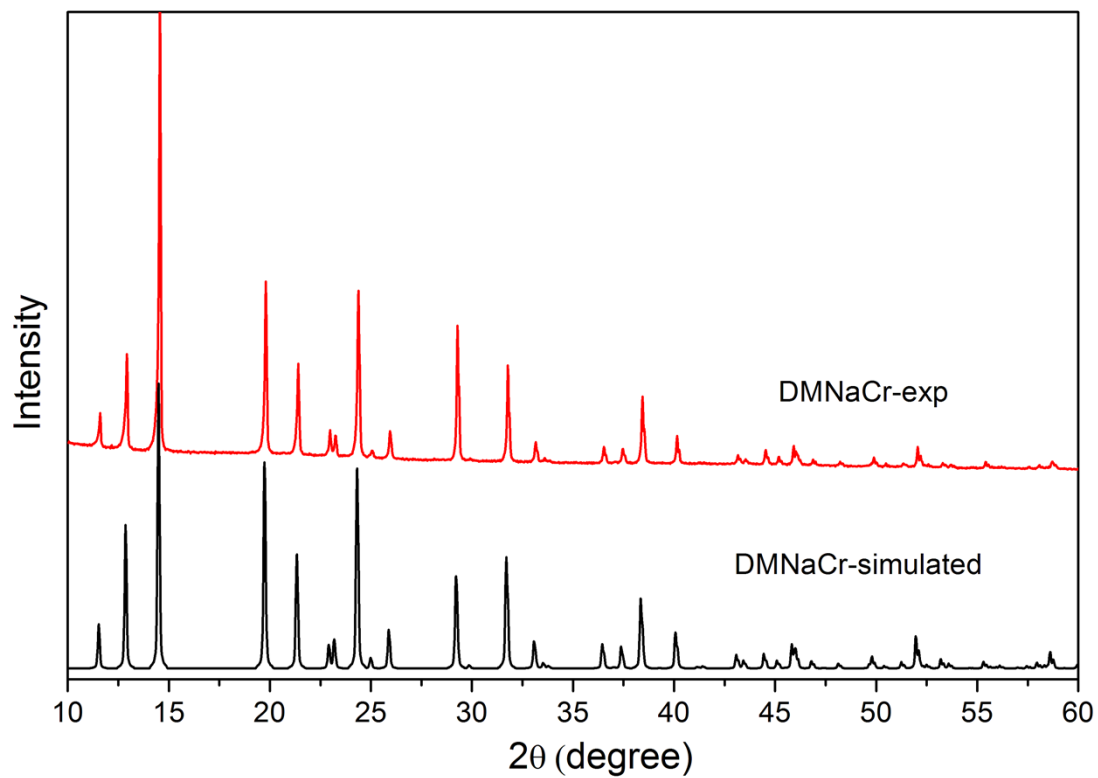

Figure S1. Powder XRD patterns for the as-prepared bulk sample of DMNaCr, with the calculated one based on the single crystal structures at 302 K.

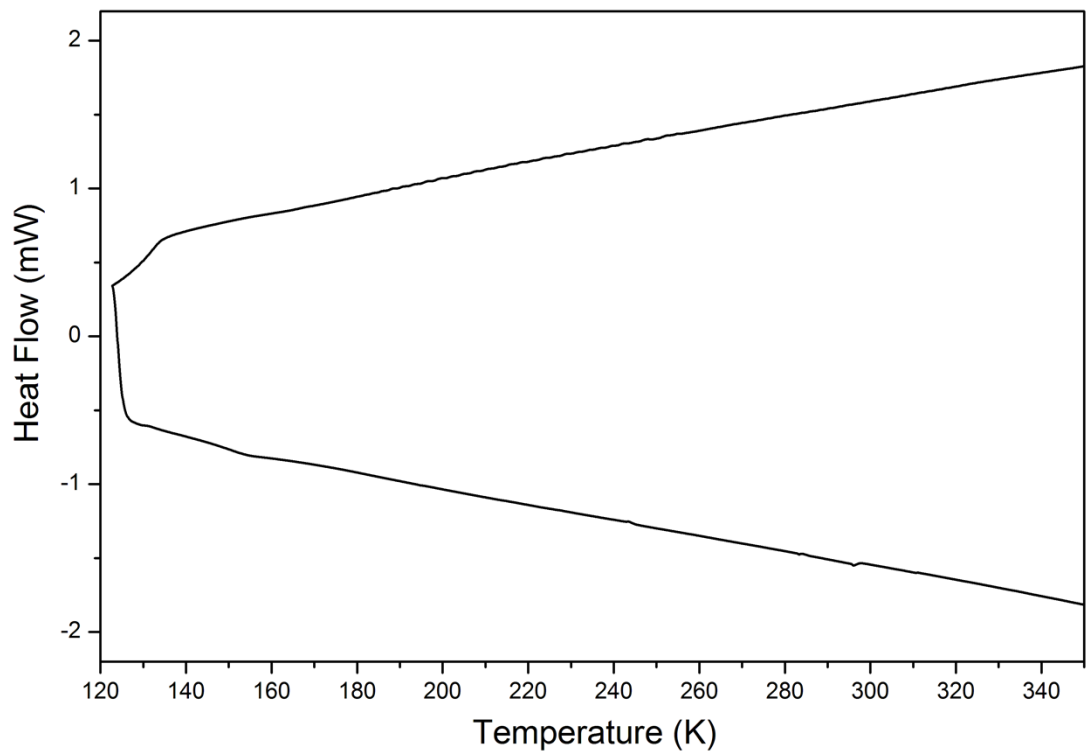

Figure S2. DSC traces for DMNaCr.



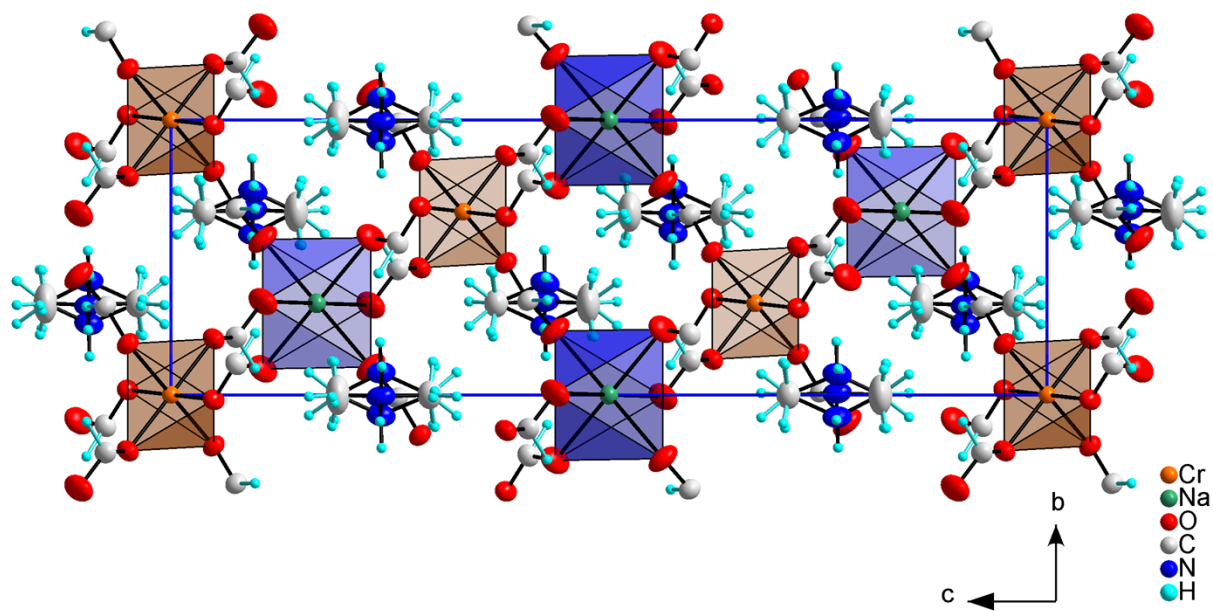

Figure S3. Structure of DMNaCr at 302 K viewed along the *a* axis. Thermal ellipsoids for N atoms of DMA<sup>+</sup> are shown in blue.

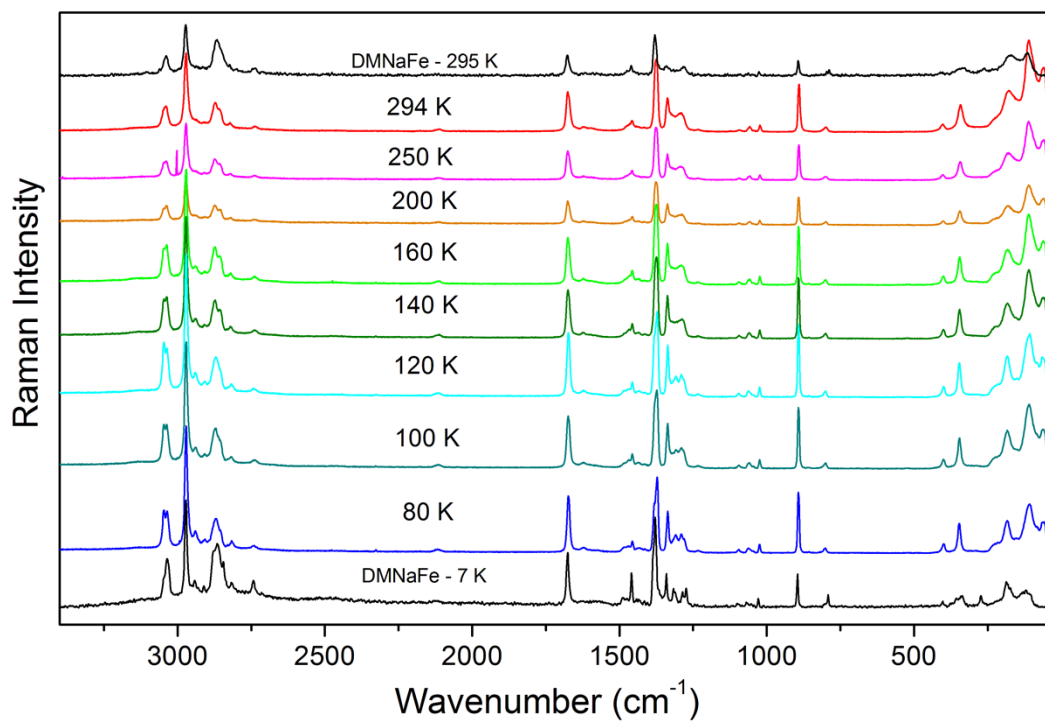

Figure S4. Raman spectra of DMNaCr recorded at various temperatures corresponding to the whole spectral range 50-3400 cm<sup>-1</sup>. Raman spectra of DMNaFe at 295 and 7 K are also shown for the comparison sake.

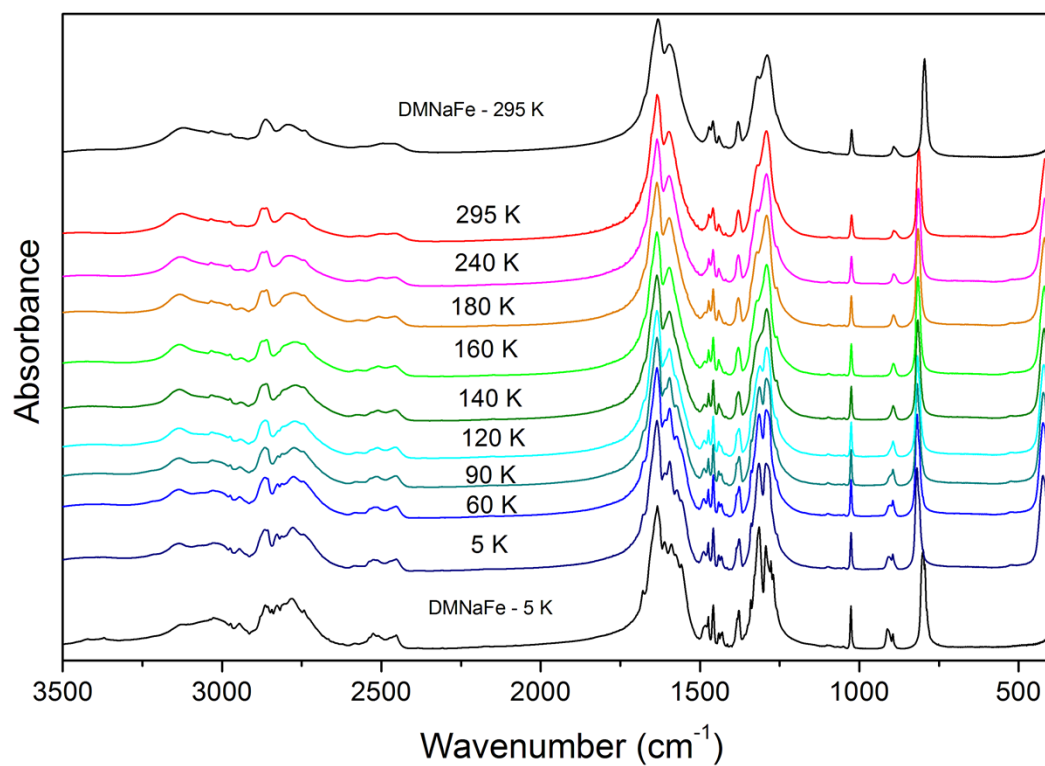

Figure S5. Mid-IR spectra of DMNaCr recorded at various temperatures corresponding to the spectral range 400-3500 cm<sup>-1</sup>. Mid-IR spectra of DMNaFe at 295 and 5 K are also shown for the comparison sake.

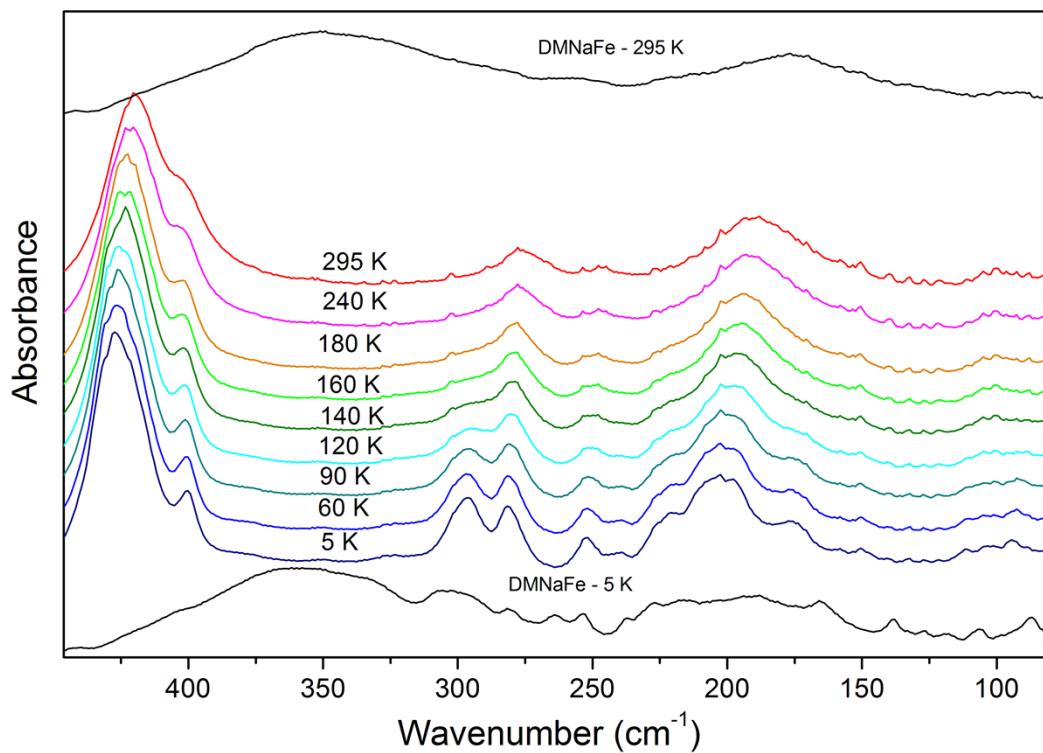

Figure S6. Mid-IR spectra of DMNaCr recorded at various temperatures corresponding to the spectral range 80-480 cm<sup>-1</sup>. Mid-IR spectra of DMNaFe at 295 and 5 K are also shown for the comparison sake.
